# Supplementary material
Source: PubMed Central journal article supplement (PMC6342467)
Supplement: NIHMS1002597-supplement-Supporting_Information.pdf [file NIHMS1002597-supplement-Supporting_Information.pdf]

## Targeting fatty-acid amide hydrolase with prodrugs for CNS-selective therapy

J. Matthew Meinig, Skylar J. Ferrara, Tania Banerji, Tapasree Banerji, Hannah S. Sanford-Crane, Dennis Bourdette, Thomas S. Scanlan\*

\*Corresponding Author: Department of Physiology & Pharmacology, Oregon Health & Science University, 3181 SW Sam Jackson Park Rd, Portland, OR 97239. Email: scanlant@ohsu.edu

### Supporting Information

**Table S1.** COS-7 cell homogenate not transfected with the FAAH1 plasmid retains little substrate hydrolysis activity compared to homogenate overexpressing FAAH. Substrates were tested at 100  $\mu$ M.

| Substrate         | FAAH (nmol * mg <sup>-1</sup> * min <sup>-1</sup> ) | Mock (nmol * mg <sup>-1</sup> * min <sup>-1</sup> ) |
|-------------------|-----------------------------------------------------|-----------------------------------------------------|
| AEA               | 69.2 $\pm$ 19.74                                    | 0 <sup>a</sup>                                      |
| Previous lead (3) | 1.36 $\pm$ 0.02                                     | 0.067 $\pm$ 0.002                                   |
| Sob-AM1 (6)       | 7.2 $\pm$ 1.2                                       | 0.03 $\pm$ 0.005                                    |
| Sob-AM2 (7)       | 5.6 $\pm$ 0.5                                       | 0.102 $\pm$ 0.007                                   |

<sup>a</sup>Below limit of detection

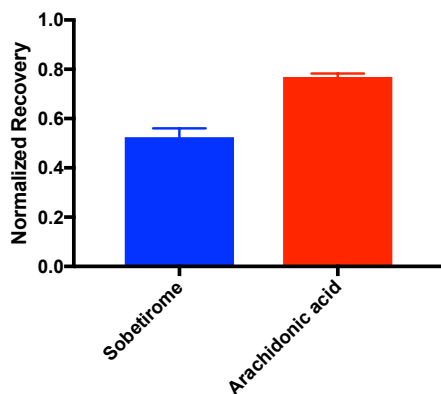

**Figure S1.** Extraction efficiencies for both sobetirome and arachidonic acid were determined for the extraction from the cell homogenate reaction. For both products, known amounts of the deuterated sample were spiked in prior to extraction while unlabelled sample was spiked in at the end of the extraction. The relative ratio of labelled/unlabelled products was determined by comparing ion ratios for matched fragments in the typical LC/MS-MS assay. Extraction efficiencies for both sobetirome (0.48) and arachidonic acid (0.76) were used to correct for differences in Figure 1B and Table 1.

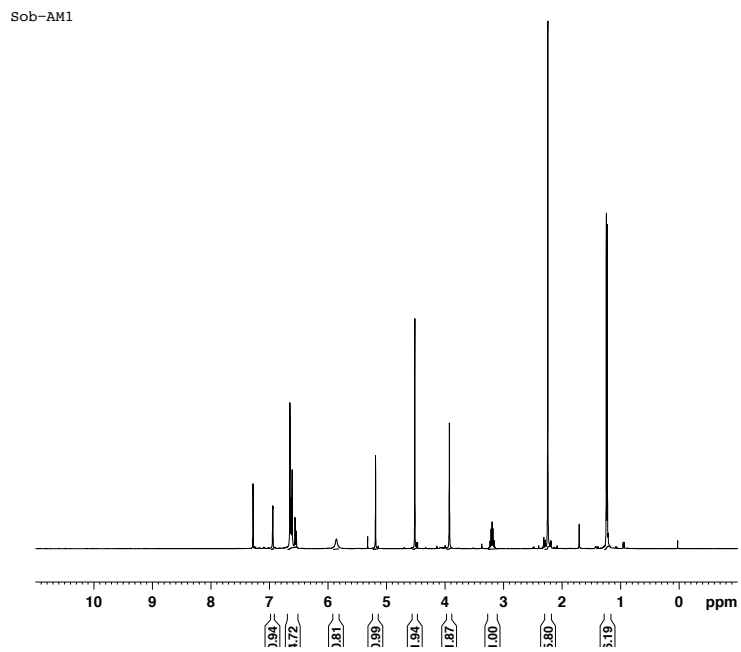

Figure S2. <sup>1</sup>H NMR spectra of Sob-AM1 (6)

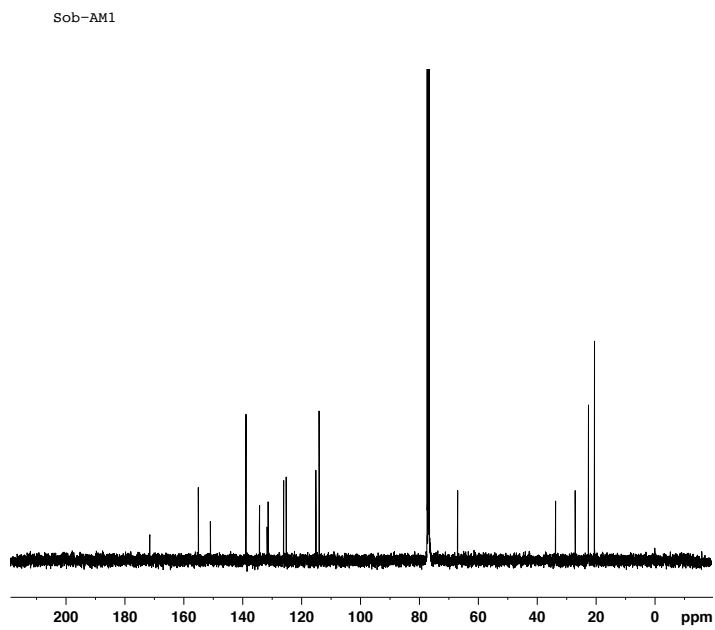

Figure S3. <sup>13</sup>C NMR spectra of Sob-AM1 (6)

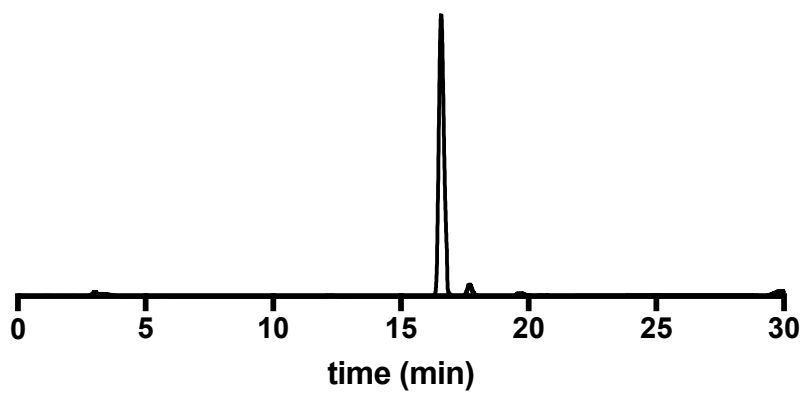

Figure S4. HPLC trace of Sob-AM1 (6)

Sob-AM2

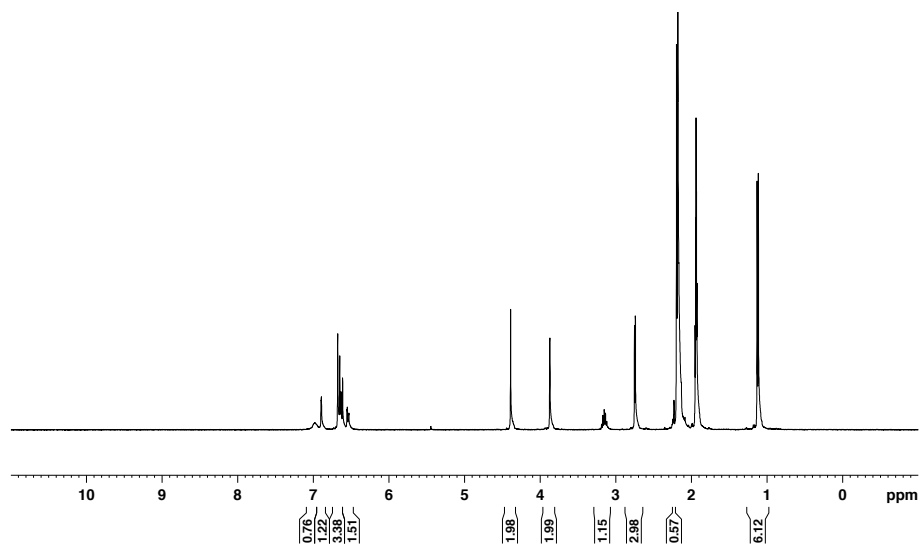

Figure S5. <sup>1</sup>H NMR spectra of Sob-AM2 (7)

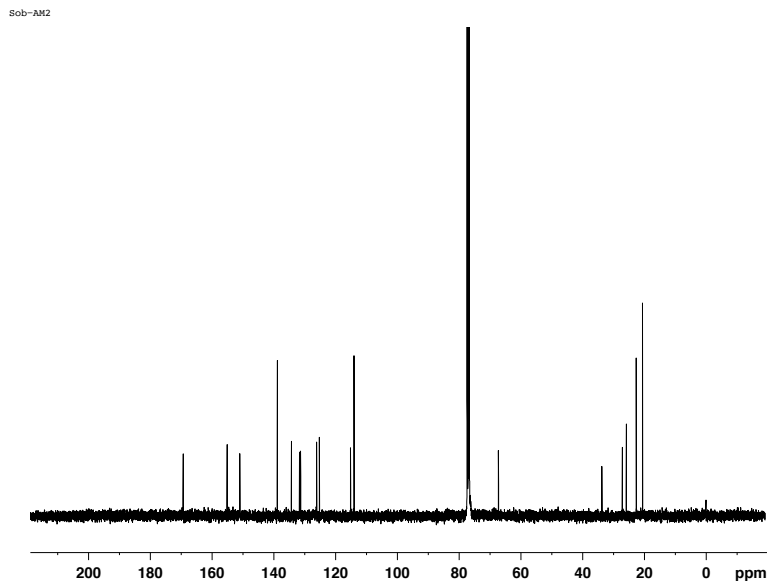

Figure S6. <sup>13</sup>C NMR spectra of Sob-AM2 (7)

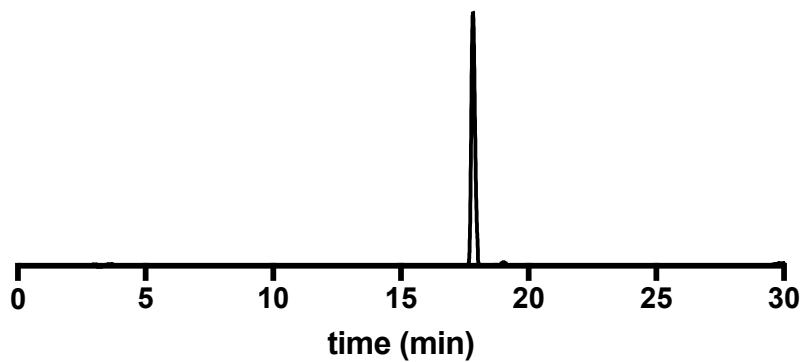

Figure S7. HPLC trace of Sob-AM2 (7)

d6-Sob-AM2

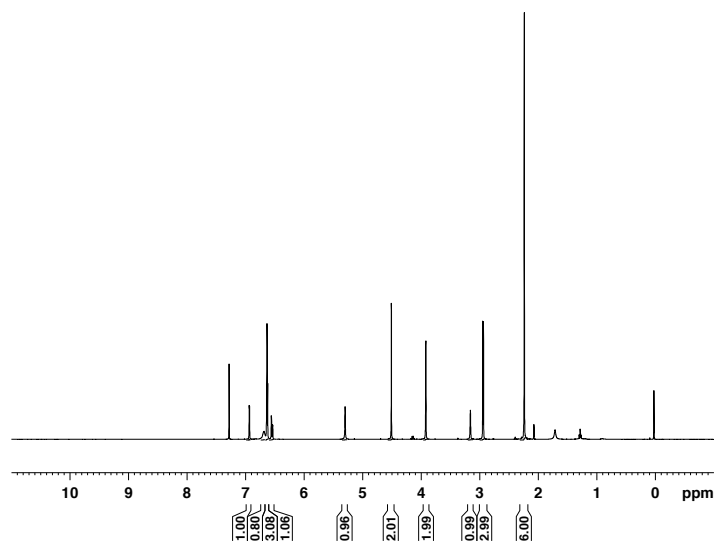

Figure S8. <sup>1</sup>H NMR spectra of d<sub>6</sub>-Sob-AM2 (8)

d6-Sob-AM2

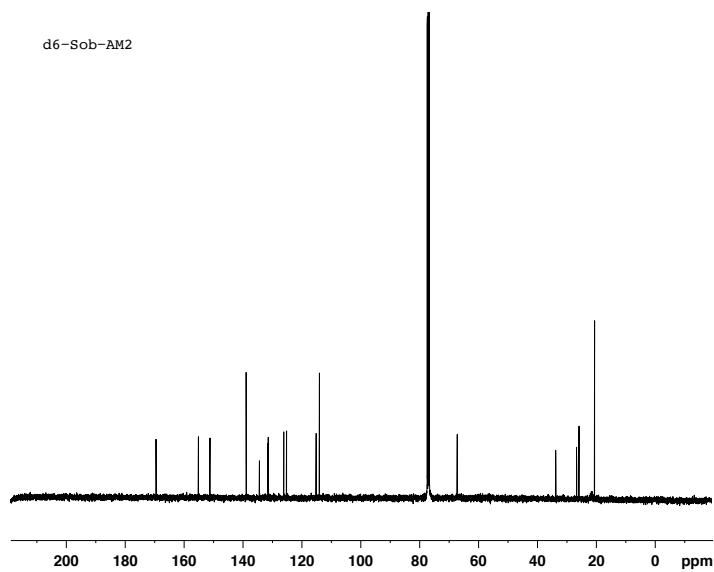

Figure S9. <sup>13</sup>C NMR spectra of d<sub>6</sub>-Sob-AM2 (8)

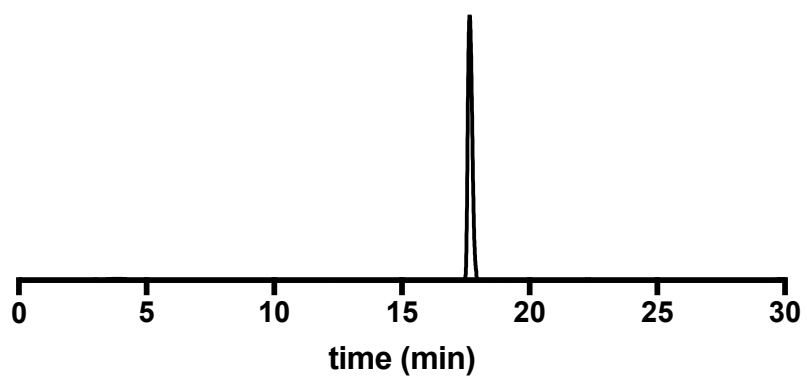

Figure S10. HPLC trace of  $d_6$ -Sob-AM2 (8)
